# Supplementary material
Source: PubMed Central journal article supplement (PMC2998967)
Supplement: Supp_Fig.pdf [file Supp_Fig.pdf]

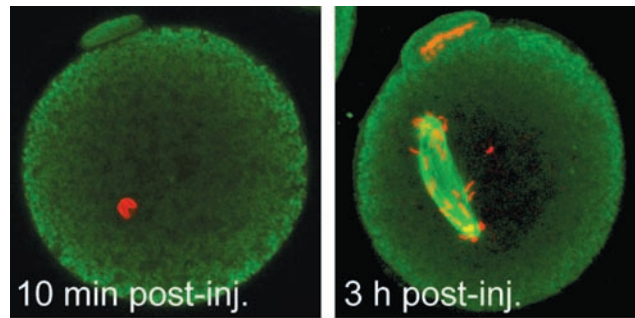

**SUPPLEMENTARY FIG. 1.** Fixation of SCNT embryos with microtubule-stabilizing buffer. To ensure that our fixation buffers crosslink chromatin and microtubules with equal efficiency, we fixed nuclear transfer-derived embryos with MTSB-XF, a microtubule-stabilizing buffer containing 2% formaldehyde, 0.5% Triton X-100, 1  $\mu$ M taxol, 10 U/mL aprotinin, and 50% deuterium oxide (Herman et al., 1983). Enucleated metaphase II oocytes were injected with cumulus cell nuclei and observed by indirect immunofluorescence at 10 min (left) and 3 h (right) postinjection. Injected oocytes were stained with an  $\alpha$ -tubulin specific antibody (green) and propidium iodide (PI) to visualize DNA (red).

## References

Herman, B., Langevin, M.A., and Albertini, D.F. (1983). The effects of taxol on the organization of the cytoskeleton in cultured ovarian granulosa cells. *Eur J Cell Biol* 31, 34–45.
